# Supplementary material for: Management Practices, Farmers’ Knowledge of Diseased Fish, and Their Occurrence in Fish Farms in Nyeri County, Kenya
Source: Hindawi journal article supplement (doi:10.1155/2021/8896604), 2021-02-18

Contrasts of adjusted predictions

Model VCE : **OIM**

Expression : **Pr(deaths), predict()**

|                               | df       | chi2         | P>chi2        |
|-------------------------------|----------|--------------|---------------|
| d3                            |          |              |               |
| (Kieni East vs Nyeri Central) | <b>1</b> | <b>3.24</b>  | <b>0.0720</b> |
| (Kieni West vs Nyeri Central) | <b>1</b> | <b>1.72</b>  | <b>0.1894</b> |
| (Othaya vs Nyeri Central)     | <b>1</b> | <b>5.39</b>  | <b>0.0203</b> |
| (Tetu vs Nyeri Central)       | <b>1</b> | <b>26.87</b> | <b>0.0000</b> |
| Joint                         | <b>4</b> | <b>33.81</b> | <b>0.0000</b> |

Supplementary Figure 1. Here we have analyzed the outcome *death* based on which county the fish were farmed (subcounty differentiation). The contrast analysis after margins analysis for prediction of *death* of fish in the different sub-counties, using Nyeri Central with the lowest recorded mortality as baseline, shows that Othaya and Tetu have significantly higher prediction of deaths. This can be seen from the marginsplot below, where confidence limits do not cross the 0-line for Othaya and Tetu (vs. Nyeri Central).

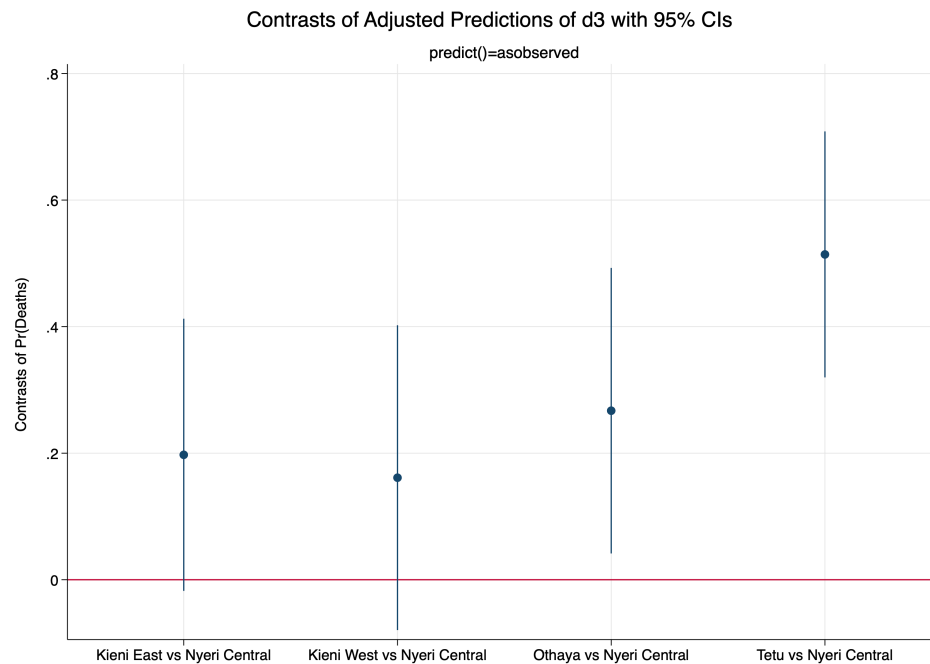

Supplementary Fig. 2. Here the margins analysis is performed to compare each county against average *deaths* for all counties. Nyeri Central has significantly lower prediction for deaths than average, and Tetu significantly higher, as can be seen from the table and the the marginsplot (where confidence limits do not cross the 0-line for Othaya and Tetu (vs. mean)).

Contrasts of adjusted predictions  
Model VCE : **OIM**  
Expression : **Pr(deaths), predict()**

|                         | df | chi2  | P>chi2 |
|-------------------------|----|-------|--------|
| d3                      |    |       |        |
| (Nyeri Central vs mean) | 1  | 9.64  | 0.0019 |
| (Kieni East vs mean)    | 1  | 0.22  | 0.6353 |
| (Kieni West vs mean)    | 1  | 0.74  | 0.3890 |
| (Othaya vs mean)        | 1  | 0.31  | 0.5753 |
| (Tetu vs mean)          | 1  | 28.87 | 0.0000 |
| Joint                   | 4  | 33.81 | 0.0000 |

Contrasts of Adjusted Predictions of d3 with 95% CIs

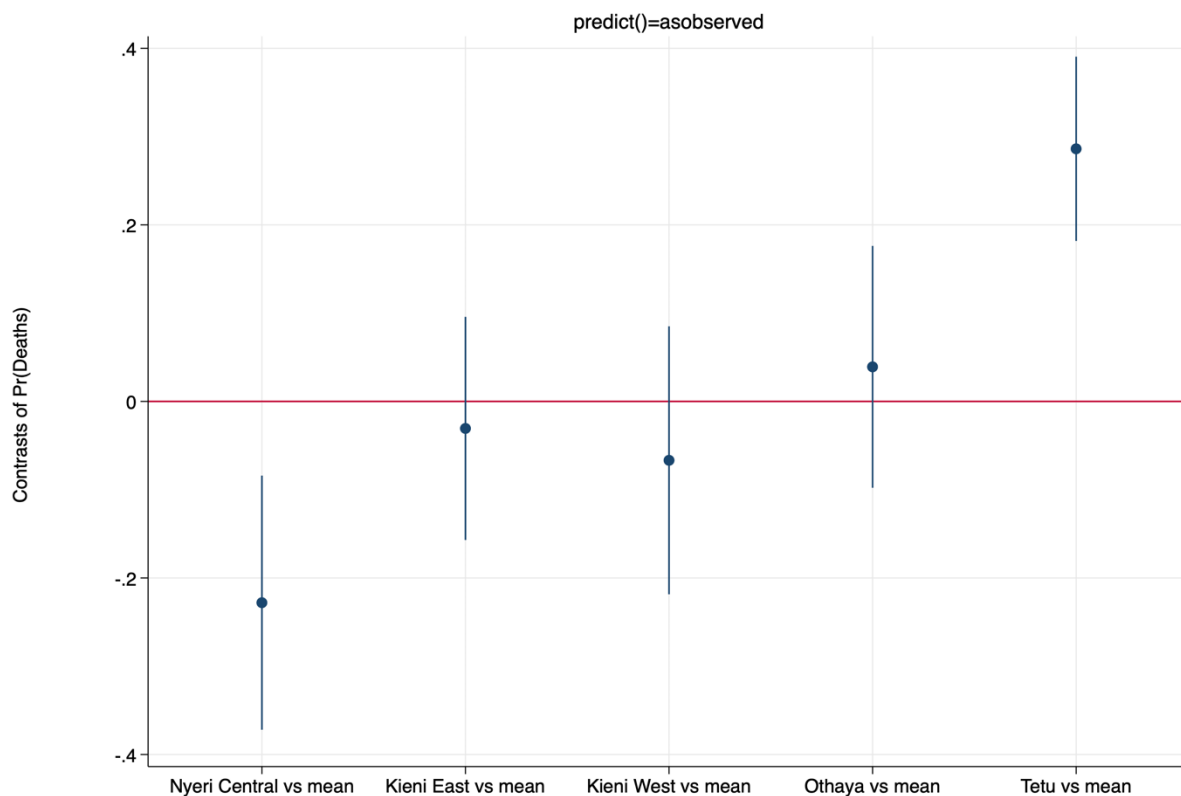

Supplement: f1 [file 8896604.f1.pdf]
